# Supplementary material for: Implementation of the Stockholm Convention on persistent organic pollutants (POPs) in Africa – progress, challenges, and recommendations after 20 years
Source: Royal Society of Chemistry journal article supplement (doi:10.1039/d3va00347g), 2024-01-01
Supplement: d3va00347g1.pdf [file d3va00347g1.pdf]

1 **Implementation of the Stockholm Convention on Persistent Organic**  
2 **Pollutants (POPs) in Africa – Progress, Challenges, and Recommendations**  
3 **after 20 Years**

4

5 Olumide Emmanuel Akinrinade<sup>a,\*</sup>, Foluso O. Agunbiade<sup>a</sup>, Rose Alani<sup>a</sup>, Olusegun O.

6 Ayejuyo<sup>a</sup>

7

8 <sup>a</sup>Department of Chemistry, University of Lagos, Akoka, Nigeria

9

10

11 \*Corresponding author: [emmanuelolu2004@yahoo.com](mailto:emmanuelolu2004@yahoo.com)

12 **Table S1** Overview of the currently listed Persistent Organic Pollutants (POPs) in the Stockholm Convention on Persistent Organic  
 13 Pollutants<sup>1,2,3</sup>

| <b>POPs</b>                | <b>Annex*</b> | <b>Year of listing</b> | <b>Uses</b>                                                                                       | <b>Current specific exemption for use</b> | <b>*Current specific exemption for production</b> | <b>Country on exemption</b> | <b>Expiry date</b> |
|----------------------------|---------------|------------------------|---------------------------------------------------------------------------------------------------|-------------------------------------------|---------------------------------------------------|-----------------------------|--------------------|
| Dieldrin <sup>(p)</sup>    | A             | 2001                   | -to control termites, textile pests, insects living in agricultural soils & insect-borne diseases | None                                      | None                                              | -                           | -                  |
| Aldrin <sup>(p)</sup>      | A             | 2001                   | - to control termites, grasshoppers, corn rootworm, and other insect pests                        | None                                      | None                                              | -                           | -                  |
| Chlordane <sup>(p)</sup>   | A             | 2001                   | - to control termites and insect pests of agricultural crops                                      | None                                      | None                                              | -                           | -                  |
| Chlordecone <sup>(p)</sup> | A             | 2009                   | - mainly used as agricultural pesticide                                                           | None                                      | None                                              | -                           | -                  |
| Dicofol <sup>(p)</sup>     | A             | 2019                   | - to control mites and also as acaricide for cotton, citrus and apple crops                       | None                                      | None                                              | -                           | -                  |
| Endrin <sup>(p)</sup>      | A             | 2001                   | - as insecticide and also to control rodents                                                      | None                                      | None                                              | -                           | -                  |

|                                                             |   |      |                                                                                                                              |      |      |   |   |
|-------------------------------------------------------------|---|------|------------------------------------------------------------------------------------------------------------------------------|------|------|---|---|
|                                                             |   |      | such as mice and voles.                                                                                                      |      |      |   |   |
| Heptachlor <sup>(p)</sup>                                   | A | 2001 | - to control insects, crop pest, termites, and malaria-carrying mosquitoes.                                                  | none | None | - | - |
| $\alpha$ -hexachlorocyclohexane (HCH) <sup>(p)</sup>        | A | 2009 | - as an insecticide                                                                                                          | none | None | - | - |
| $\beta$ -hexachlorocyclohexane (HCH) <sup>(p)</sup>         | A | 2009 | - as an insecticide                                                                                                          | none | None | - | - |
| Lindane <sup>(p)</sup>                                      | A | 2009 | - as broad-spectrum pest control of crops and ectoparasites in both veterinary and human applications.                       | none | None | - | - |
| Technical endosulfan and its related isomers <sup>(p)</sup> | A | 2011 | - to control crop pests, tsetse flies and ectoparasites of cattle                                                            | none | None | - | - |
| Toxaphene <sup>(p)</sup>                                    | A | 2001 | - used as insecticide and to control ticks and mites in livestock.                                                           | none | None | - | - |
| Mirex <sup>(p)</sup>                                        | A | 2001 | - mainly to combat fire ants; and to control termites and other ants. Also used as a fire retardant in plastics, rubber, and | none | None | - | - |

|                                                                              |   |      |                                                                                                                                                                                |                                                                        |      |                                                               |      |
|------------------------------------------------------------------------------|---|------|--------------------------------------------------------------------------------------------------------------------------------------------------------------------------------|------------------------------------------------------------------------|------|---------------------------------------------------------------|------|
|                                                                              |   |      | electrical goods.                                                                                                                                                              |                                                                        |      |                                                               |      |
| Pentachlorophenol (PCP) and its salts and esters <sup>(p)</sup>              | A | 2015 | - used as herbicide, insecticide, fungicide, algacide, disinfectant and as an ingredient in antifouling paint.                                                                 | Utility poles and cross-arms <sup>a</sup>                              | None | -                                                             | -    |
| Hexabromobiphenyl (HBB) <sup>(i)</sup>                                       | A | 2009 | - used as a flame retardant additive mainly in the 1970s.                                                                                                                      | none                                                                   | None | -                                                             | -    |
| Hexabromocyclododecane (HBCD or HBCDD) <sup>(i)</sup>                        | A | 2013 | - mainly used as flame retardant additive mainly in expanded and extruded polystyrene foam insulation; and also in textile applications and electric and electronic appliances | Expanded polystyrene and extruded polystyrene in building <sup>a</sup> | None | none                                                          | -    |
| Commercial pentabromodiphenyl ether (BDE) (tetra-BDE/penta-BDE)              | A | 2009 | - used as additive flame retardant                                                                                                                                             | Recycling, use and disposal of articles                                | None | Brazil, Cambodia, Japan, Republic of Korea, Turkiye, Vietnam, | 2030 |
| Commercial octabromodiphenyl ether (BDE) (hexa-BDE/hepta-BDE) <sup>(i)</sup> | A | 2009 | - used as additive flame retardant                                                                                                                                             | Recycling, use and disposal of articles                                | None | Brazil, Cambodia, Japan, Republic of Korea, Turkiye, Vietnam, | 2030 |

|                                                              |       |      |                                                                                                                                                               |                                                                                                            |                                                                                                            |                                                                                                                                                                                        |      |
|--------------------------------------------------------------|-------|------|---------------------------------------------------------------------------------------------------------------------------------------------------------------|------------------------------------------------------------------------------------------------------------|------------------------------------------------------------------------------------------------------------|----------------------------------------------------------------------------------------------------------------------------------------------------------------------------------------|------|
| Commercial decabromodiphenyl ether (deca-BDE) <sup>(i)</sup> | A     | 2017 | used mainly as an additive flame retardant in commercial products and electronics such as housings of computers and TVs, wires and cables, pipes and carpets. | Vehicles, aircraft, textile, additives in plastic housing etc, & Polyurethane foam for building insulation | Vehicles, aircraft, textile, additives in plastic housing etc, & Polyurethane foam for building insulation | Use -Argentina, Brazil, European Union, Iran, New Zealand, Norway, Switzerland, United Kingdom, Vietnam<br>Production - European Union, Republic of Korea, Switzerland, United Kingdom | 2036 |
| Hexachlorobenzene (HCB) <sup>(p,i,u)</sup>                   | A + C | 2001 | - as fungicide in crops. It is also a byproduct of the manufacture of some industrial chemicals and exists as an impurity in several pesticide formulations.  | none<br>(But use still possible according with note (iii) of part 1 of Annex A of the Convention)          | None                                                                                                       | -                                                                                                                                                                                      | -    |
| Hexachlorobutadiene(HCBD) <sup>(i,u)</sup>                   | A + C | 2015 | - mostly used as a solvent for chloring containing compounds                                                                                                  | none                                                                                                       | None                                                                                                       | -                                                                                                                                                                                      | -    |
| Pentachlorobenzene(PeCB) <sup>(p,l,u)</sup>                  | A + C | 2009 | - used in PCB products, in dyestuff carriers, as a fungicide, a flame                                                                                         | none                                                                                                       | None                                                                                                       | -                                                                                                                                                                                      | -    |

|                                                                                             |       |      |                                                                                                                                                                                                                                                                                                                                       |                                                                                                                                          |      |   |                                    |
|---------------------------------------------------------------------------------------------|-------|------|---------------------------------------------------------------------------------------------------------------------------------------------------------------------------------------------------------------------------------------------------------------------------------------------------------------------------------------|------------------------------------------------------------------------------------------------------------------------------------------|------|---|------------------------------------|
|                                                                                             |       |      | retardant and as a chemical intermediate e.g. previously for the production of quitozene.                                                                                                                                                                                                                                             |                                                                                                                                          |      |   |                                    |
| Polychlorinated biphenyls (PCBs) <sup>(i,u)</sup>                                           | A + C | 2001 | - used as heat exchange fluids, in electric transformers and capacitors, and as additives in paint, carbonless copy paper, and plastics.                                                                                                                                                                                              | - use in close system equipment such as transformers, capacitors or other receptacles containing liquid stocks as specified <sup>a</sup> | None | - | 2025<br>(Subject to review by COP) |
| Perfluorohexane sulfonic acid (PFHxS), its salts and PFHxS-related compounds <sup>(i)</sup> | A     | 2022 | - used in (1) Aqueous Film-Forming Foams (AFFFs) for fire-fighting; (2) metal plating; (3) textiles, leather and upholstery; (4) polishing agents and cleaning/washing agents; (5) coatings, impregnation/proofing (for protection from damp, fungus etc.); and (6) within the manufacturing of electronics and semiconductors. Other | none                                                                                                                                     | None | - | -                                  |

|                                                                                     |   |      |                                                                                                                                                                                                                                                                                 |                                                                                                                                                                                                                                                                                                                                                                                                                                                            |      |                                                                                                          |      |
|-------------------------------------------------------------------------------------|---|------|---------------------------------------------------------------------------------------------------------------------------------------------------------------------------------------------------------------------------------------------------------------------------------|------------------------------------------------------------------------------------------------------------------------------------------------------------------------------------------------------------------------------------------------------------------------------------------------------------------------------------------------------------------------------------------------------------------------------------------------------------|------|----------------------------------------------------------------------------------------------------------|------|
|                                                                                     |   |      | potential uses include pesticides, flame retardants, paper and packaging, in the oil industry, and hydraulic fluids.                                                                                                                                                            |                                                                                                                                                                                                                                                                                                                                                                                                                                                            |      |                                                                                                          |      |
| Perfluorooctanoic acid (PFOA), its salts and PFOA -related compounds <sup>(i)</sup> | A | 2019 | - used widely in the production of fluoroelastomers and fluoropolymers, for the production of non-stick kitchen ware, food processing equipment. PFOA-related compounds are used as surfactants and surface treatment agents in textiles, paper and paints, firefighting foams. | Photolithography or etch processes in semiconductor manufacturing, invasive implantable medical devices, fire-fighting foams, manufacture of fluoroelastomers for the production of O-ring, v-belts and plastic accessories for car interiors, photographic coatings applied to films, textile for oil and water repellents for the protection workers, production of perfluorooctyl bromide for the production of pharmaceutical products, manufacture of | None | Argentina, European Union, New Zealand, Norway, Republic of Korea, Switzerland, United Kingdom, Vietnam, | 2036 |

|                                                            |       |      |                                                                                                                                                                              |                                                                                                                                                                                                                                                                                                                       |                                                                                   |                    |                       |
|------------------------------------------------------------|-------|------|------------------------------------------------------------------------------------------------------------------------------------------------------------------------------|-----------------------------------------------------------------------------------------------------------------------------------------------------------------------------------------------------------------------------------------------------------------------------------------------------------------------|-----------------------------------------------------------------------------------|--------------------|-----------------------|
|                                                            |       |      |                                                                                                                                                                              | <p>polytetrafluoroethylene (PTFE) and polyvinylidene fluoride (PVDF) for specified productions, use of perfluorooctyl iodide for the production of perfluorooctyl bromide, manufacture of polyfluoroethylene propylene (FEP) for the production of high-voltage electrical wire and cables for power transmission</p> |                                                                                   |                    |                       |
| <p>Polychlorinated naphthalenes (PCNs)<sup>(i,u)</sup></p> | A + C | 2015 | <p>- used as insulating coatings for electrical wires. Also as wood preservatives, as well as rubber and plastic additives, for capacitor dielectrics and in lubricants.</p> | <p>Production of polyfluorinated naphthalenes including octafluoronaphthalene</p>                                                                                                                                                                                                                                     | <p>Production of polyfluorinated naphthalenes including octafluoronaphthalene</p> | Russian Federation | <p>not stipulated</p> |



|                                                                                                                |   |      |                                                                                                                                                                   |                                                                                                                                                                                                                                                                                               |                                     |         |      |
|----------------------------------------------------------------------------------------------------------------|---|------|-------------------------------------------------------------------------------------------------------------------------------------------------------------------|-----------------------------------------------------------------------------------------------------------------------------------------------------------------------------------------------------------------------------------------------------------------------------------------------|-------------------------------------|---------|------|
| Short-chain chlorinated paraffins (SCCPs) <sup>(i)</sup><br>(C <sub>10-13</sub> ; chlorine content > 48%)      | A | 2017 | - used as a plasticizer in rubber, paints, and adhesives. Also as flame retardants for plastics as well as an extreme pressure lubricant in metal working fluids. | Production of transmission belts, rubber conveyor belts, leather industry, lubricant additives, tubes for outdoor decoration bulbs, waterproofing and fire retardant paints, adhesives, metal processing, secondary plasticizers in polyvinyl chloride except in toys and children's products | None                                | Vietnam | 2023 |
| Dichlorodiphenyltrichloroethane (DDT) <sup>(p)</sup>                                                           | B | 2001 | - mostly used to control malaria vector. Also as pesticide                                                                                                        | Malaria vector control <sup>a</sup>                                                                                                                                                                                                                                                           | Malaria vector control <sup>a</sup> | none    | -    |
| Perfluorooctane sulfonic acid (PFOS), its salts and perfluorooctane sulfonyl fluoride (PFOSF) <sup>(p,i)</sup> | B | 2009 | -used as additives in electric and electronic parts, fire fighting foam, photo imaging, hydraulic fluids and textiles.                                            | Photo imaging, photoresist and anti-reflective coatings for semi-conductors, etching agent for compound semi-conductors and ceramic filters,                                                                                                                                                  | None                                | -       | -    |

|                                                          |   |      |   |                                                                                                                                                                                                                                                                   |   |   |   |
|----------------------------------------------------------|---|------|---|-------------------------------------------------------------------------------------------------------------------------------------------------------------------------------------------------------------------------------------------------------------------|---|---|---|
|                                                          |   |      |   | aviation hydraulic fluids, metal plating (hard metal plating) only in closed-loop systems, certain medical devices as specified, fire fighting foam & insect baits for control of leaf-cutting ants from <i>Atta spp.</i> and <i>Acromyrmex spp.</i> <sup>a</sup> |   |   |   |
|                                                          |   |      |   |                                                                                                                                                                                                                                                                   |   |   |   |
| Polychlorinated dibenzo-p-dioxins (PCDDs) <sup>(u)</sup> | C | 2001 | - | -                                                                                                                                                                                                                                                                 | - | - | - |
| Polychlorinated dibenzofurans (PCDFs) <sup>(u)</sup>     | C | 2001 | - | -                                                                                                                                                                                                                                                                 | - | - | - |

14  
15 p – pesticidal uses, i – industrial uses, u – unintentional production

16 \*Annex A – POPs targeted for elimination; Annex B - POPs targeted for restriction; Annex C – Unintentional POPs targeted for reduction

17 #as permitted for the parties listed in the Register

18 <sup>a</sup> – Acceptable purpose: No country is currently in the register of exemption for DDT, HBCDD, PCP and its salts and esters

19 Chemicals proposed for listing under the Convention: Chlorinated paraffins, long chain perfluorocarxylic acids (LC-PFCAs), UV-328,  
20 dechlorane plus, methoxychlor, chlorpyrifo

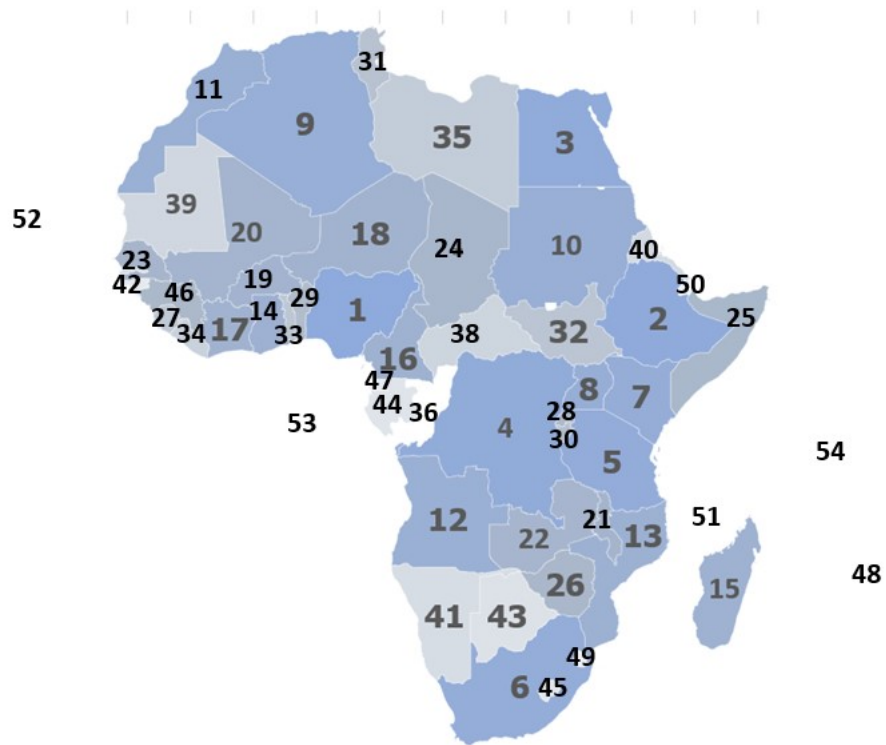

22

23 **Figure S1:** African countries (number ranked in order of population. The name,  
24 corresponding with the number, and the population of individual country are indicated in  
25 Table S2)

26

27

28

29

30

31

32

33

34

35

36

37

38

**Table S2:** African countries, their subregions and populations

| <b>S/N</b> | <b>Country</b> | <b>Subregion</b> | <b>Population<sup>a</sup></b> |
|------------|----------------|------------------|-------------------------------|
| 1          | Nigeria        | Western Africa   | 223,804,632                   |
| 2          | Ethiopia       | Eastern Africa   | 126,527,060                   |
| 3          | Egypt          | Northern Africa  | 112,716,598                   |
| 4          | DR Congo       | Middle Africa    | 102,262,808                   |
| 5          | Tanzania       | Eastern Africa   | 67,438,106                    |
| 6          | South Africa   | Southern Africa  | 60,414,495                    |
| 7          | Kenya          | Eastern Africa   | 55,100,586                    |
| 8          | Sudan          | Eastern Africa   | 48,109,006                    |
| 9          | Uganda         | Northern Africa  | 48,582,334                    |
| 10         | Algeria        | Northern Africa  | 45,606,480                    |
| 11         | Morocco        | Northern Africa  | 37,840,044                    |
| 12         | Angola         | Middle Africa    | 36,684,202                    |
| 13         | Ghana          | Eastern Africa   | 34,121,985                    |
| 14         | Mozambique     | Western Africa   | 33,897,354                    |
| 15         | Madagascar     | Eastern Africa   | 30,325,732                    |
| 16         | Côte d'Ivoire  | Middle Africa    | 28,873,034                    |
| 17         | Cameroon       | Western Africa   | 28,647,293                    |
| 18         | Niger          | Western Africa   | 27,202,843                    |
| 19         | Burkina Faso   | Western Africa   | 23,251,485                    |
| 20         | Mali           | Western Africa   | 23,293,698                    |
| 21         | Malawi         | Eastern Africa   | 20,931,751                    |
| 22         | Zambia         | Eastern Africa   | 20,569,737                    |
| 23         | Chad           | Western Africa   | 18,278,568                    |
| 24         | Senegal        | Middle Africa    | 17,763,163                    |
| 25         | Somalia        | Eastern Africa   | 18,143,378                    |
| 26         | Zimbabwe       | Eastern Africa   | 16,665,409                    |
| 27         | Guinea         | Western Africa   | 14,190,612                    |
| 28         | Rwanda         | Eastern Africa   | 14,094,683                    |

---

|    |                          |                 |            |
|----|--------------------------|-----------------|------------|
| 29 | Benin                    | Western Africa  | 13,712,828 |
| 30 | Tunisia                  | Eastern Africa  | 12,458,223 |
| 31 | Burundi                  | Northern Africa | 13,238,559 |
| 32 | South Sudan              | Eastern Africa  | 11,088,796 |
| 33 | Togo                     | Western Africa  | 9,053,799  |
| 34 | Sierra Leone             | Western Africa  | 8,791,092  |
| 35 | Libya                    | Northern Africa | 6,888,388  |
| 36 | Congo                    | Middle Africa   | 6,106,869  |
| 37 | Central African Republic | Western Africa  | 5,742,315  |
| 38 | Liberia                  | Middle Africa   | 5,418,377  |
| 39 | Mauritania               | Western Africa  | 4,862,989  |
| 40 | Eritrea                  | Eastern Africa  | 3,748,901  |
| 41 | Gambia                   | Southern Africa | 2,773,168  |
| 42 | Botswana                 | Western Africa  | 2,675,352  |
| 43 | Namibia                  | Southern Africa | 2,604,172  |
| 44 | Gabon                    | Middle Africa   | 2,436,566  |
| 45 | Lesotho                  | Southern Africa | 2,330,318  |
| 46 | Guinea-Bissau            | Western Africa  | 2,150,842  |
| 47 | Equatorial Guinea        | Middle Africa   | 1,714,671  |
| 48 | Mauritius                | Eastern Africa  | 1,300,557  |
| 49 | Eswatini                 | Southern Africa | 1,210,822  |
| 50 | Djibouti                 | Eastern Africa  | 1,136,455  |
| 51 | Comoros                  | Eastern Africa  | 852,075    |
| 52 | Cabo Verde               | Western Africa  | 598,682    |
| 53 | Sao Tome & Principe      | Middle Africa   | 231,856    |
| 54 | Seychelles               | Eastern Africa  | 107,660    |

---

<sup>a</sup>Worldometer<sup>4</sup>

40  
41  
42  
43

44 **Table S3:** List of African countries that are signatories or have acceded to the Stockholm  
 45 Convention on Persistent Organic Pollutants including their latest round of Party reports<sup>5,6</sup>

| S/<br>N | Participant                         | Signature,<br>Succession<br>to Signature<br>(d) | Ratification,<br>Accession (a) | Entry into<br>force | Latest<br>national<br>report as at<br>27th January<br>2024 |
|---------|-------------------------------------|-------------------------------------------------|--------------------------------|---------------------|------------------------------------------------------------|
| 1       | Algeria                             | 05/09/2001                                      | 22/09/2006                     | 21/12/2006          | 2                                                          |
| 2       | Angola                              | n/a                                             | 23/10/2006 (a)                 | 21/01/2007          | n/a                                                        |
| 3       | Benin                               | 23/05/2001                                      | 05/01/2004                     | 17/05/2004          | n/a                                                        |
| 4       | Botswana                            | n/a                                             | 28/10/2002 (a)                 | 17/05/2004          | n/a                                                        |
| 5       | Burkina Faso                        | 23/05/2001                                      | 31/12/2004                     | 31/03/2005          | n/a                                                        |
| 6       | Burundi                             | 02/04/2002                                      | 02/08/2005                     | 31/10/2005          | 5                                                          |
| 7       | Cabo Verde                          | n/a                                             | 01/03/2006 (a)                 | 30/05/2006          | n/a                                                        |
| 8       | Cameroon                            | 05/10/2001                                      | 19/05/2009                     | 17/08/2009          | 5                                                          |
| 9       | Central African Republic            | 09/05/2002                                      | 12/02/2008                     | 12/05/2008          | 3                                                          |
| 10      | Chad                                | 16/05/2002                                      | 10/03/2004                     | 08/06/2004          | n/a                                                        |
| 11      | Comoros                             | 23/05/2001                                      | 23/02/2007                     | 24/05/2007          | n/a                                                        |
| 12      | Republic of Congo                   | 04/12/2001                                      | 12/02/2007                     | 13/05/2007          | n/a                                                        |
| 13      | Côte d'Ivoire                       | 23/05/2001                                      | 20/01/2004                     | 17/05/2004          | 5                                                          |
| 14      | Democratic Republic of<br>the Congo | n/a                                             | 23/03/2005 (a)                 | 21/06/2005          | 4                                                          |
| 15      | Djibouti                            | 15/11/2001                                      | 11/03/2004                     | 09/06/2004          | n/a                                                        |
| 16      | Egypt                               | 17/05/2002                                      | 02/05/2003                     | 17/05/2004          | 5                                                          |
| 17      | Equatorial Guinea                   | n/a                                             | 24/12/2019 (a)                 | 23/03/2020          | n/a                                                        |
| 18      | Eritrea                             | n/a                                             | 10/03/2005 (a)                 | 08/06/2005          | 3                                                          |
| 19      | Eswatini                            | n/a                                             | 13/01/2006 (a)                 | 13/04/2006          | n/a                                                        |
| 20      | Ethiopia                            | 17/05/2002                                      | 09/01/2003                     | 17/05/2004          | 2                                                          |
| 21      | Gabon                               | 21/05/2002                                      | 07/05/2007                     | 05/08/2007          | 2                                                          |
| 22      | Gambia                              | 23/05/2001                                      | 28/04/2006                     | 27/07/2006          | 1                                                          |
| 23      | Ghana                               | 23/05/2001                                      | 30/05/2003                     | 17/05/2004          | 5                                                          |
| 24      | Guinea                              | 23/05/2001                                      | 11/12/2007                     | 10/03/2008          | 5                                                          |
| 25      | Guinea-Bissau                       | 24/04/2002                                      | 06/08/2008                     | 04/11/2008          | n/a                                                        |

---

|    |                             |            |                |            |     |
|----|-----------------------------|------------|----------------|------------|-----|
| 26 | Kenya                       | 23/05/2001 | 24/09/2004     | 23/12/2004 | 5   |
| 27 | Lesotho                     | 23/01/2002 | 23/01/2002     | 17/05/2004 | n/a |
| 28 | Liberia                     | n/a        | 23/05/2002 (a) | 17/05/2004 | n/a |
| 29 | Libya                       | n/a        | 14/06/2005 (a) | 12/09/2005 | n/a |
| 30 | Madagascar                  | 24/09/2001 | 18/11/2005     | 16/02/2006 | 5   |
| 31 | Malawi                      | 22/05/2002 | 27/02/2009     | 28/05/2009 | 4   |
| 32 | Mali                        | 23/05/2001 | 05/09/2003     | 17/05/2004 | 3   |
| 33 | Mauritania                  | 08/08/2001 | 22/07/2005     | 20/10/2005 | 2   |
| 34 | Mauritius                   | 23/05/2001 | 13/07/2004     | 11/10/2004 | 5   |
| 35 | Morocco                     | 23/05/2001 | 15/06/2004     | 13/09/2004 | 4   |
| 36 | Mozambique                  | 23/05/2001 | 31/10/2005     | 29/01/2006 | 2   |
| 37 | Namibia                     | n/a        | 24/06/2005 (a) | 22/09/2005 | n/a |
| 38 | Niger                       | 12/10/2001 | 12/04/2006     | 11/07/2006 | n/a |
| 39 | Nigeria                     | 23/05/2001 | 24/05/2004     | 22/08/2004 | 5   |
| 40 | Rwanda                      | n/a        | 05/06/2002 (a) | 17/05/2004 | 4   |
| 41 | Sao Tome and Principe       | 03/04/2002 | 12/04/2006     | 11/07/2006 | 4   |
| 42 | Senegal                     | 23/05/2001 | 08/10/2003     | 17/05/2004 | 2   |
| 43 | Seychelles                  | 25/03/2002 | 03/06/2008     | 01/09/2008 | 5   |
| 44 | Sierra Leone                | n/a        | 26/09/2003 (a) | 17/05/2004 | n/a |
| 45 | Somalia                     | n/a        | 26/07/2010 (a) | 24/10/2010 | n/a |
| 46 | South Africa                | 23/05/2001 | 04/09/2002     | 17/05/2004 | 5   |
| 47 | South Sudan                 | n/a        | n/a            | n/a        | n/a |
| 48 | Sudan                       | 23/05/2001 | 29/08/2006     | 27/11/2006 | 3   |
| 49 | Togo                        | 23/05/2001 | 22/07/2004     | 20/10/2004 | 2   |
| 50 | Tunisia                     | 23/05/2001 | 17/06/2004     | 15/09/2004 | 3   |
| 51 | Uganda                      | n/a        | 20/07/2004 (a) | 18/10/2004 | 4   |
| 52 | United Republic of Tanzania | 23/05/2001 | 30/04/2004     | 29/07/2004 | 2   |
| 53 | Zambia                      | 23/05/2001 | 07/07/2006     | 05/10/2006 | 2   |
| 54 | Zimbabwe                    | 23/05/2001 | 01/03/2012     | 30/05/2012 | 4   |

---

46

47 n/a – not available

48 **Table S4** Properties of persistent organic pollutants<sup>7</sup>

| POP properties                                   | Evidence of POP properties                                                                                                                                                                                                                                                                                                                                                                                                                                                                                                                                                                                                                                                                                                                                                              |
|--------------------------------------------------|-----------------------------------------------------------------------------------------------------------------------------------------------------------------------------------------------------------------------------------------------------------------------------------------------------------------------------------------------------------------------------------------------------------------------------------------------------------------------------------------------------------------------------------------------------------------------------------------------------------------------------------------------------------------------------------------------------------------------------------------------------------------------------------------|
| Persistence                                      | <p>(i) Evidence that the half-life of the chemical in water is greater than two months, or that its half-life in soil is greater than six months, or that its half-life in sediment is greater than six months; or</p> <p>(ii) Evidence that the chemical is otherwise sufficiently persistent to justify its consideration within the scope of this Convention;</p>                                                                                                                                                                                                                                                                                                                                                                                                                    |
| Bio-accumulation                                 | <p>(i) Evidence that the bio-concentration factor or bio-accumulation factor in aquatic species for the chemical is greater than 5,000 or, in the absence of such data, that the log Kow is greater than 5;</p> <p>(ii) Evidence that a chemical presents other reasons for concern, such as high bio-accumulation in other species, high toxicity or ecotoxicity; or</p> <p>(iii) Monitoring data in biota indicating that the bio-accumulation potential of the chemical is sufficient to justify its consideration within the scope of this Convention</p>                                                                                                                                                                                                                           |
| Potential for long-range environmental transport | <p>(i) Measured levels of the chemical in locations distant from the sources of its release that are of potential concern;</p> <p>(ii) Monitoring data showing that long-range environmental transport of the chemical, with the potential for transfer to a receiving environment, may have occurred via air, water or migratory species; or</p> <p>(iii) Environmental fate properties and/or model results that demonstrate that the chemical has a potential for long-range environmental transport through air, water or migratory species, with the potential for transfer to a receiving environment in locations distant from the sources of its release. For a chemical that migrates significantly through the air, its half-life in air should be greater than two days;</p> |
| Adverse effects                                  | <p>(i) Evidence of adverse effects to human health or to the environment that justifies consideration of the chemical within the scope of this Convention; or</p> <p>(ii) Toxicity or ecotoxicity data that indicate the potential for damage to human health or to the environment.</p>                                                                                                                                                                                                                                                                                                                                                                                                                                                                                                |

49

50

51

52

53

54



55 **Table S5:** Laboratories listed in Africa for POPs analysing databank<sup>8</sup>

| <b>S/N</b> | <b>Laboratories</b>                                                                                          | <b>Countries</b>             |
|------------|--------------------------------------------------------------------------------------------------------------|------------------------------|
| 1          | Laboratory of Ecotoxicology ERGS, Kinshasa                                                                   | Democratic Republic of Congo |
| 2          | Central Laboratory of Residue Analysis of Pesticides and Heavy Metals in Food                                | Egypt                        |
| 3          | Cairo Central Center Laboratory for Environmental Monitoring in EEAA (Egyptian Environmental Affairs Agency) |                              |
| 4          | Environmental Chemistry Laboratory, CSIR Water Research Institute                                            |                              |
| 5          | Pesticide Residue Laboratory, Ghana Standards Board                                                          | Ghana                        |
| 6          | Food and Drugs Board Laboratory Services Department                                                          |                              |
| 7          | Department of Chemistry, Ghana Atomic Energy Commission                                                      |                              |
| 8          | Department of Chemistry, University of Nairobi                                                               | Kenya                        |
| 9          | Government Chemist Department                                                                                |                              |
| 10         | Analytical Chemistry Laboratory (ACL) – Kenya Plant Health Inspectorate Service                              |                              |
| 11         | Environmental Toxicology and Quality Control Laboratory of Central Veterinary Laboratory                     | Mali                         |
| 12         | Agricultural Chemistry Division                                                                              |                              |
| 13         | Department of Chemistry                                                                                      |                              |
| 14         | Government Analyst Division, HQL                                                                             | Mauritius                    |
| 15         | Mauritius Sugar Industry Research Institute                                                                  |                              |
| 16         | National Environmental Laboratory                                                                            |                              |
| 17         | Forensic Science Laboratory                                                                                  | Morocco                      |
| 18         | National Laboratory for Studies and Monitoring of the Pollution                                              |                              |
| 19         | LANSPEX                                                                                                      |                              |
| 20         | Analytical and Environmental Laboratory                                                                      | Nigeria                      |
| 21         | Multidisciplinary Central Research Laboratory/Basel Convention Regional Coordinating Centre for Africa       |                              |
| 22         | University of Nigeria, Nsukka, Research Laboratory                                                           |                              |
| 23         | Environmental Chemistry Laboratory of CERES-LOCUSTOX Foundation                                              | Senegal                      |
| 24         | Persistent Organic Pollutant and Toxicant Programme (POPT), School for Environmental Sciences                | South Africa                 |
| 25         | Pesticide Metabolism and Residue Laboratory                                                                  | Sudan                        |
| 26         | National Chemical Laboratories                                                                               |                              |

---

|    |                                                                                                                    |                             |
|----|--------------------------------------------------------------------------------------------------------------------|-----------------------------|
| 27 | Dedicated Pesticide Residue Analysis Lab. - Chemistry Department Laboratory                                        |                             |
| 28 | Government Chemist Laboratory Agency                                                                               | United Republic of Tanzania |
| 29 | TBS - Tanzania Bureau of Standards Food and Chemical Laboratory                                                    |                             |
| 30 | CEP - LAB (Chemical and Process Engineering Lab.)                                                                  |                             |
| 31 | Laboratoire de l'Institut Togolais de Recherche Agronomique / Direction des Laboratoires                           | Togo                        |
| 32 | CAMU - Laboratoire de Toxicologie                                                                                  |                             |
| 33 | Laboratoire de Controles et d'Analyses des Pesticides, Ministère de l'Agriculture et des Ressources Hydrauliques   |                             |
| 34 | Laboratoire du Milieu Marin (Unite Organique)                                                                      |                             |
| 35 | INRAP - Institut National de Recherche et d'Analyse Physico-Chimique                                               | Tunisia                     |
| 36 | INRST - Laboratoire de Géochimie et Physico Chimie des Eaux, Centre National des Sciences et Technologies des Eaux |                             |
| 37 | Laboratoire de Biophysique Appliquée à la Nutrition, Institut National de Nutrition et de Technologie Alimentaire  |                             |
| 38 | CITET - Centre International des Technologies de l'Environnement de Tunis                                          |                             |
| 39 | LCAE - Laboratoire Central d'Analyses et d'Essais                                                                  |                             |
| 40 | GCLA - Government Chemist and Analytical Laboratory                                                                | Uganda                      |
| 41 | Chemiphar (U) Ltd                                                                                                  |                             |
| 42 | Zambia Bureau of Standards                                                                                         |                             |
| 43 | UNZA - Department of Chemistry, University of Zambia                                                               | Zambia                      |
| 44 | Food and Drugs Control                                                                                             |                             |

---

57 \*44 laboratories in 16 African countries are listed among 256 laboratories.

58

59 **Table S6** Regulatory guidelines on POPs by the European Union<sup>a9, b10</sup>

| POPs                                                                               | Concentrations – market products or wastes (mg/kg); water (µg/L); Biota (µg/kg) |                                         |                     |                                                   |                                                  |                                                    |                                                   |                          |
|------------------------------------------------------------------------------------|---------------------------------------------------------------------------------|-----------------------------------------|---------------------|---------------------------------------------------|--------------------------------------------------|----------------------------------------------------|---------------------------------------------------|--------------------------|
|                                                                                    | Market (UTC) <sup>a</sup>                                                       | Market <sup>a</sup>                     | Wastes <sup>a</sup> | Water AA-EQS (Inland surface waters) <sup>b</sup> | Water AA-EQS (Other surface waters) <sup>b</sup> | Water MAC-EQS (Inland surface waters) <sup>b</sup> | Water MAC-EQS (Other surface waters) <sup>b</sup> | Biota (EQS) <sup>b</sup> |
| Tetra-BDE / penta-BDE / hexa-BDE / hepta-BDE / deca-BDE                            | 10 (0.001 % by weight)                                                          | -                                       | -                   | -                                                 | -                                                | -                                                  | -                                                 | -                        |
| ∑tetra-, penta-, hexa-, hepta- and decaBDE<br>(∑BDEs-28, 47, 99, 100, 153 and 154) | 500                                                                             | -                                       | 1,000               | -                                                 | -                                                | (0.14)                                             | (0.014)                                           | (0.0085)                 |
| PFOS                                                                               | 0.001 % (by weight) (*0.1%)                                                     | -                                       | 50                  | $6.5 \times 10^{-4}$                              | $1.3 \times 10^{-4}$                             | 36                                                 | 7.2                                               | 9.1                      |
| HBCDD                                                                              | 0.01                                                                            | -                                       | 1,000               | 0.0016                                            | 0.0008                                           | 0.5                                                | 0.05                                              | 167                      |
| SCCPs                                                                              | -                                                                               | Substances or mixture – (1 % by weight) | 10,000              | -                                                 | -                                                | -                                                  | -                                                 | -                        |
|                                                                                    |                                                                                 | Articles - 0.15 % (by                   |                     |                                                   |                                                  |                                                    |                                                   |                          |

|                                                                                           |   |   | weight) |                      |                      |                      |                      |                           |
|-------------------------------------------------------------------------------------------|---|---|---------|----------------------|----------------------|----------------------|----------------------|---------------------------|
| Endosulfan                                                                                | - | - | 50      | 0.005                | 0.0005               | 0.01                 | 0.004                | -                         |
| Hexachlorobutadiene                                                                       | - | - | 100     | -                    | -                    | 0.6                  | 0.6                  | 55                        |
| Polychlorinated naphthalenes                                                              | - | - | 10      |                      |                      |                      |                      |                           |
| PCDD/PCDF                                                                                 | - | - | 0.015   |                      |                      |                      |                      |                           |
| DDT                                                                                       | - | - | 50      | 0.025                | 0.025                | na                   | na                   | na                        |
| Hexachlorobenzene                                                                         | - | - | 50      | -                    | -                    | 0.05                 | 0.05                 | 10                        |
| hexachlorocyclohexanes<br>(including lindane)                                             | - | - | 50      | 0.02                 | 0.002                | 0.04                 | 0.02                 | -                         |
| Heptachlor (+heptachlor epoxide)                                                          | - | - | 50      | $(2 \times 10^{-7})$ | $(1 \times 10^{-8})$ | $(3 \times 10^{-4})$ | $(3 \times 10^{-5})$ | $(6.7 \times 10^{-3})$    |
| chlordan / chlordecone /<br>pentachlorobenzene / Mirex /<br>toxaphene / hexabromobiphenyl | - | - | 50      | -                    | -                    | -                    | -                    | -                         |
| Aldrin<br>( $\Sigma$ (aldrin, dieldrin, endrin, isodrin))                                 | - | - | 50      | (0.01)               | (0.005)              | na                   | na                   | na                        |
| Dieldrin                                                                                  | - | - | 50      | -                    | -                    | na                   | na                   | na                        |
| Endrin                                                                                    | - | - | 50      | -                    | -                    | na                   | na                   | na                        |
| Polychlorinated Biphenyls<br>(PCB)                                                        | - | - | 50      | -                    | -                    | -                    | -                    |                           |
| $\Sigma$ PCDD, PCDF, PCB-DL                                                               | - | - | -       | -                    | -                    | -                    | -                    | 0.0065 $\mu$ g/<br>kg TEQ |

|                           |   |   |   |       |        |    |    |   |
|---------------------------|---|---|---|-------|--------|----|----|---|
| Pentachlorobenzene (PeCB) | - | - | - | 0.007 | 0.0007 | na | na | - |
| PCP                       | - | - | - | 0.4   | 0.4    | 1  | 1  | - |

60

61 \*PFOS in semi-finished products or articles, or parts thereof calculated with reference to the mass of structurally or micro-structurally distinct  
62 parts that contain PFOS or, for textiles or other coated materials, if the amount of PFOS is lower than 1 µg/m<sup>2</sup> of the coated material.

63

64 UTC - unintentional trace contaminant      AA – Annual average      MCQ – Maximum allowable concentration

65

66 EQS – Environmental quality standard      na – not applicable

67

68

69

70

71

72

73

74

75

76

77

78

79

80

81

**Table S7** Available regulatory guidelines for PCBs<sup>11</sup>

| Agency  | Focus                             | Level                                                                                          | Comments                                                                                                                                              |
|---------|-----------------------------------|------------------------------------------------------------------------------------------------|-------------------------------------------------------------------------------------------------------------------------------------------------------|
| OSHA    | Air:<br>workplace                 | 1.0 mg/m <sup>3</sup> for PCBs<br>with 42% Cl<br>0.5 mg/m <sup>3</sup> for PCBs<br>with 54% Cl | Enforceable; TWA*, PEL <sup>a</sup><br>Both standards encompass all physical forms of aerosols,<br>vapor, mist, sprays, and PCB-laden dust particles. |
| NIOSH   | Air:<br>workplace                 | 1.0 µg/m <sup>3</sup>                                                                          | Advisory; TWA<br>(10-hour)                                                                                                                            |
| EPA     | Drinking<br>water:<br>environment | 0.0005 ppm                                                                                     | Enforceable MCL <sup>b</sup>                                                                                                                          |
| FDA     | Food:<br>environment              | 0.2-3.0 ppm (all<br>foods)<br>2.0 ppm (fish)<br>10 ppm (paper food-<br>packaging materials)    | Enforceable; Tolerance level                                                                                                                          |
| WHO FAO | Food:<br>environment              | 6.0 µg/kg per day                                                                              | Allowable daily intake                                                                                                                                |

83

84

85

\*TWA (time-weighted average): TWA concentration for a normal workday and a 40-hour work week to which nearly all workers may be repeatedly exposed

86

87

<sup>a</sup> PEL (permissible exposure limit): the highest level of PCBs in the air to which a worker may be exposed, averaged over an 8-hour workday

88

<sup>b</sup> MCL (maximum contaminant level): enforceable level for drinking water

89

90

91 **Table S8** USEPA regional screening level (RSL) for POPs<sup>12</sup>  
 92

| POP                           | Soil (mg/kg)           |                        | Air ( $\mu\text{g}/\text{m}^3$ ) |                      | Tap water ( $\mu\text{g}/\text{L}$ ) | Protection groundwater SSLs (mg/kg) |                      |
|-------------------------------|------------------------|------------------------|----------------------------------|----------------------|--------------------------------------|-------------------------------------|----------------------|
|                               | Residential            | Industrial             | Residential                      | Industrial           |                                      | Risk-based SSL                      | MCL-based SSL        |
| Dieldrin                      | $3.4 \times 10^{-2}$   | $1.4 \times 10^{-1}$   | $6.1 \times 10^{-4}$             | $6.1 \times 10^{-4}$ | $1.8 \times 10^{-3}$                 | $7.1 \times 10^{-5}$                | -                    |
| Aldrin                        | $3.9 \times 10^{-2}$   | $1.8 \times 10^{-1}$   | $5.7 \times 10^{-4}$             | $2.5 \times 10^{-3}$ | $9.2 \times 10^{-4}$                 | $1.5 \times 10^{-4}$                | -                    |
| Chlordane (Technical mixture) | 1.7                    | 7.7                    | $2.8 \times 10^{-2}$             | $1.2 \times 10^{-1}$ | $2.0 \times 10^{-2}$                 | $2.7 \times 10^{-3}$                | $2.7 \times 10^{-1}$ |
| Chlordecone                   | $5.4 \times 10^{-2}$   | $2.3 \times 10^{-1}$   | $6.1 \times 10^{-4}$             | $2.7 \times 10^{-3}$ | $3.5 \times 10^{-3}$                 | $1.2 \times 10^{-4}$                | -                    |
| Dicofol                       | -                      | -                      | -                                | -                    | -                                    | -                                   | -                    |
| Endrin                        | $1.9 \times 10^1$      | $2.5 \times 10^2$      | -                                | -                    | $2.3 \times 10^0$                    | $9.2 \times 10^{-2}$                | $8.1 \times 10^{-2}$ |
| Heptachlor                    | $1.3 \times 10^{-1}$   | $6.3 \times 10^{-1}$   | $2.2 \times 10^{-3}$             | $9.4 \times 10^{-3}$ | $1.4 \times 10^{-3}$                 | $1.2 \times 10^{-4}$                | $3.3 \times 10^{-2}$ |
| (Heptachlor Epoxide)          | $(7.0 \times 10^{-2})$ | $(3.3 \times 10^{-1})$ | $(1.1 \times 10^{-3})$           | $4.7 \times 10^{-3}$ | $1.4 \times 10^{-3}$                 | $2.8 \times 10^{-5}$                | $4.1 \times 10^{-3}$ |
| $\alpha$ -HCH                 | $8.6 \times 10^{-2}$   | $3.6 \times 10^{-1}$   | $1.6 \times 10^{-3}$             | $6.8 \times 10^{-3}$ | $7.2 \times 10^{-3}$                 | $4.2 \times 10^{-5}$                | -                    |
| $\beta$ -HCH                  | $3.0 \times 10^{-1}$   | 1.3                    | $5.3 \times 10^{-3}$             | $2.3 \times 10^{-2}$ | $2.5 \times 10^{-2}$                 | $1.5 \times 10^{-4}$                | -                    |
| $\gamma$ -HCH (Lindane)       | $5.7 \times 10^{-1}$   | 2.5                    | $9.1 \times 10^{-3}$             | $4.0 \times 10^{-2}$ | $4.2 \times 10^{-2}$                 | $2.4 \times 10^{-4}$                | $1.2 \times 10^{-3}$ |
| Endosulfan                    | $4.7 \times 10^2$      | $7.0 \times 10^3$      | -                                | -                    | $1.0 \times 10^{-2}$                 | $1.4 \times 10^0$                   |                      |
| (Endosulfan Sulfate)          | $3.8 \times 10^2$      | $4.9 \times 10^3$      | -                                | -                    | $1.1 \times 10^{-2}$                 | $2.1 \times 10^0$                   |                      |
| Toxaphene                     | $4.9 \times 10^{-1}$   | 2.1                    | $8.8 \times 10^{-3}$             | $3.8 \times 10^{-2}$ | $7.1 \times 10^{-2}$                 | $1.1 \times 10^{-2}$                | $4.6 \times 10^{-1}$ |

|                               |                      |                      |                                                  |                                                  |                          |                          |                          |
|-------------------------------|----------------------|----------------------|--------------------------------------------------|--------------------------------------------------|--------------------------|--------------------------|--------------------------|
| Mirex                         | $3.6E \times 10^2$   | $1.7 \times 10^{-1}$ | $5.5 \times 10^{-4}$                             | $2.4 \times 10^{-3}$                             | $8.8 \times 10^{-4}$     | $6.3 \times 10^{-4}$     | -                        |
| PCP                           | 1.0                  | 4.0                  | $5.5 \times 10^{-1}$                             | 2.4                                              | $4.1 \times 10^{-2}$     | $5.7 \times 10^{-5}$     | $1.4 \times 10^{-3}$     |
| HBB                           | -                    | -                    | -                                                | -                                                | -                        | -                        | -                        |
| HBCDD                         | -                    | -                    | -                                                | -                                                | -                        | -                        | -                        |
| Penta-BDE                     | $1.6 \times 10^2$    | $2.3 \times 10^3$    | -                                                | -                                                | $4.0 \times 10^1$        | $1.7 \times 10^0$        | -                        |
| octa-BDE                      | $1.9 \times 10^2$    | $2.5 \times 10^3$    | -                                                | -                                                | $6.0 \times 10^1$        | $1.2 \times 10^1$        | -                        |
| deca-BDE                      | $4.4 \times 10^2$    | $3.3 \times 10^3$    | -                                                | -                                                | $1.1 \times 10^2$        | $6.2 \times 10^1$        | -                        |
| HCB                           | $2.1 \times 10^{-1}$ | $9.6 \times 10^{-1}$ | $6.1 \times 10^{-3}$                             | $2.7 \times 10^{-2}$                             | $9.8 \times 10^{-3}$     | $1.2 \times 10^{-4}$     | $1.3 \times 10^{-2}$     |
| HCBD                          | 1.2                  | 5.3                  | $1.3 \times 10^{-1}$                             | $5.6 \times 10^{-1}$                             | $1.4 \times 10^{-1}$     | $2.7 \times 10^{-4}$     | -                        |
| PeCB                          | $6.3 \times 10^1$    | $9.3 \times 10^2$    | -                                                | -                                                | $3.2 \times 10^0$        | $2.4 \times 10^{-2}$     | -                        |
| PCB - high risk<br>(low risk) | $2.3 \times 10^{-1}$ | $9.4 \times 10^{-1}$ | $4.9 \times 10^{-3}$<br>( $2.8 \times 10^{-2}$ ) | $2.1 \times 10^{-2}$<br>( $1.2 \times 10^{-1}$ ) | ( $4.4 \times 10^{-2}$ ) | ( $6.8 \times 10^{-3}$ ) | ( $7.8 \times 10^{-2}$ ) |
| PFHxS                         | 1.3                  | $1.6 \times 10^1$    | -                                                | -                                                | $3.9 \times 10^{-1}$     | $1.7 \times 10^{-4}$     | -                        |
| PFOA                          | $1.9 \times 10^{-1}$ | 2.5                  | -                                                | -                                                | $6.0 \times 10^{-2}$     | $9.1 \times 10^{-4}$     | -                        |
| DDD                           | 2.3                  | 9.6                  | $4.1 \times 10^{-2}$                             | $1.8 \times 10^{-1}$                             | $3.2 \times 10^{-2}$     | $7.5 \times 10^{-3}$     | -                        |
| DDE                           | 2.0                  | 9.3                  | $2.9 \times 10^{-2}$                             | $1.3 \times 10^{-1}$                             | $4.6 \times 10^{-2}$     | $1.1 \times 10^{-2}$     | -                        |
| DDT                           | 1.9                  | 8.5                  | $2.9 \times 10^{-2}$                             | $1.3 \times 10^{-1}$                             | $2.3 \times 10^{-1}$     | $7.7 \times 10^{-2}$     | -                        |
| PFOS                          | $1.3 \times 10^{-1}$ | 1.6                  | -                                                | -                                                | $4.0 \times 10^{-2}$     | $3.1 \times 10^{-4}$     | -                        |



## 94 **References**

- 95 [1] M. Sharkey, S. Harrad, M. Abou-Elwafa Abdallah, D. S. Drage and H. Berresheim,  
96 *Environ. Int.*, 2020, **144**, 106041, DOI: 10.1016/j.envint.2020.106041.
- 97 [2] United Nations Environment Programme (UNEP). Stockholm Convention on Persistent  
98 Organic Pollutants (POPs) - Text and Annexes [Internet]. 2022 [cited 2023 March 02]  
99 Available from: <https://UNEP-POPS-COPCONVTEXT-2021.English.pdf>.
- 100 [3] Z. Wang, S. Adu-Kumi, M. L. Diamond, R. Guardans, T. Harner, A. Harte, N. Kajiwara,  
101 J. Klánová, J. Liu, E. G. Moreira, D.C.G. Muir, N. Suzuki, V. Pinas, T. Seppälä, R. Weber  
102 and B. Yuan, *Environ. Sci. Technol.*, 2022, **56** (5), 2936-2949, DOI: 10.1021/acs.est.1c06120
- 103 [4] Worldometers. African Countries by population [Internet]. 2023 [cited 2023 September  
104 17]. Available from: [https://www.Worldometers.info/population/countries-in-africa-by-](https://www.Worldometers.info/population/countries-in-africa-by-population/)  
105 [population/](https://www.Worldometers.info/population/countries-in-africa-by-population/)
- 106 [5] United Nations Environmental Programme (UNEP). Status of ratification [Internet]. 2019  
107 [cited 2023 April 21]. Available from: [https://chm.pops.int/Countries/StatusofRatifications](https://chm.pops.int/Countries/StatusofRatifications/PartiesandSignatoires/tabid/4500/Default.aspx)  
108 [/PartiesandSignatoires/tabid/4500/ Default.aspx](https://chm.pops.int/Countries/StatusofRatifications/PartiesandSignatoires/tabid/4500/Default.aspx).
- 109 [6] United Nations Environment Programme (UNEP). National Reports [Internet]. 2019  
110 [cited 2024 January 27]. Available from: [http://chm.pops.int/Countries/Reporting/](http://chm.pops.int/Countries/Reporting/NationalReports/tabid/3668/Default.aspx)  
111 [NationalReports/tabid/3668/ Default.aspx](http://chm.pops.int/Countries/Reporting/NationalReports/tabid/3668/Default.aspx).
- 112 [7] United Nations Environment Programme (UNEP). Stockholm Convention on Persistent  
113 Organic Pollutants (POPs) - Text And Annexes [Internet]. 2022 [cited 2023 March 02]  
114 Available from: <https://UNEP-POPS-COPCONVTEXT-2021.English.pdf>.
- 115 [8] United Nations Environment Programme (UNEP). UNEP databank of laboratories  
116 analyzing persistent organic pollutants "pops laboratory databank" [Internet]. [cited 2023  
117 June 05]. Available from: <https://labs.pops.int/Laboratory/Search.aspx>.
- 118 [9] European Commission. European Commission Regulation (EU) 2019/1021 of the  
119 European parliament and of the council of 20 June, 2019 on persistent organic pollutants  
120 (recast) [Internet]. 2019 [cited 2023 July 18]. Available from: [https://eur-lex.europa.eu/legal-](https://eur-lex.europa.eu/legal-content/EN/TXT/HTML/?uri=CELEX:32019R1021)  
121 [content/EN/TXT/HTML/? uri=CELEX:32019R1021](https://eur-lex.europa.eu/legal-content/EN/TXT/HTML/?uri=CELEX:32019R1021).
- 122 [10] European Commission. European Commission Directive 2013/39/EU of the European  
123 Parliament and of the council of 12 August 2013 amending Directives 2000/60/EC and  
124 2008/105/EC as regards priority substances in the field of water policy [Internet]. 2013 [cited  
125 2023 July 18]. Available from: [https://eur-lex.europa.eu/LexUriServ/LexUriServ.do?uri=OJ](https://eur-lex.europa.eu/LexUriServ/LexUriServ.do?uri=OJ:L:2013:226:0001:0017:en:PDF)  
126 [:L:2013:226:0001:0017:en:PDF](https://eur-lex.europa.eu/LexUriServ/LexUriServ.do?uri=OJ:L:2013:226:0001:0017:en:PDF)
- 127 [11] Agency for Toxic Substances and Disease Registry (ATSDR) [Internet]. 2023 [cited  
128 2023 June 24]. Available from: [https://www.atsdr.cdc.gov/csem/polychlorinated-biphenyls/](https://www.atsdr.cdc.gov/csem/polychlorinated-biphenyls/standards.html#:~:text=FDA%20mandates%20tolerances%20of%200.2,10%20ppm%20%5B,FDA%201996c%5D)  
129 [standards.html#:~:text=FDA%20mandates%20tolerances%20of%200.2,10%20ppm%20%5B](https://www.atsdr.cdc.gov/csem/polychlorinated-biphenyls/standards.html#:~:text=FDA%20mandates%20tolerances%20of%200.2,10%20ppm%20%5B,FDA%201996c%5D)  
130 [FDA%201996c%5D](https://www.atsdr.cdc.gov/csem/polychlorinated-biphenyls/standards.html#:~:text=FDA%20mandates%20tolerances%20of%200.2,10%20ppm%20%5B,FDA%201996c%5D).

131 [12] United States Environmental Protection Agency (USEPA). Regional Screening Levels  
132 (RSLs) - Generic Tables [Internet]. 2023 [cited 2023 August 13]. Available from:  
133 <https://semspub.epa.gov/work/HQ/404057.pdf>.

134
